# Supplementary material
Source: MDPI journal article supplement (https://www.mdpi.com/2077-1312/8/10/822)
Supplement: s1 [file s1]

## Supplements

**Supplemental Table S1.** pH and salinity of the sea water and meltwater stream of inside and outside of Marian Cove (mean  $\pm$  SD).

|                  | pH              | Salinity (psu) | Location                | N  |
|------------------|-----------------|----------------|-------------------------|----|
| Sea water        | 7.95 $\pm$ 0.20 | 31.0 $\pm$ 2.5 | Marian Cove intertidal  | 6  |
|                  | 8.00 $\pm$ 0.04 | 32.7 $\pm$ 0.4 | Marian Cove central bay | 13 |
|                  | 8.12 $\pm$ 0.18 | 32.9 $\pm$ 2.1 | Outside of Marian Cove  | 8  |
| Meltwater stream | 6.40 $\pm$ 1.13 | -              | Marian Cove             | 33 |
|                  | 7.00 $\pm$ 0.57 | -              | Outside of Marian Cove  | 3  |

The water quality (pH, salinity) of meltwater stream/seawater in Barton Peninsula was measured from Dec 27, 2017 to Feb 10, 2018. The meltwater stream was significantly more acidic than the sea water (Mann–Whitney *U*-test;  $N_1 = 27$ ,  $N_2 = 36$ ,  $U = 53$ ,  $Z = -6.018$ ,  $P < 0.001$ ). The sea water of Marian Cove (both intertidal and surface seawater) was significantly more acidic and had a lower salinity than that outside of Marian Cove which is far from the glacial wall and close to the open sea (Mann–Whitney *U*-test; pH:  $N_1 = 19$ ,  $N_2 = 8$ ,  $U = 38.5$ ,  $Z = -2.009$ ,  $P = 0.045$ , salinity:  $N_1 = 18$ ,  $N_2 = 8$ ,  $U = 23$ ,  $Z = -2.727$ ,  $P = 0.005$ ). The intertidal sea water of Marian cove had a lower salinity than the surface sea water (Mann–Whitney *U*-test:  $N_1 = 6$ ,  $N_2 = 12$ ,  $U = 12$ ,  $Z = -2.255$ ,  $P = 0.024$ ).

**Supplemental Table S2.** pH, salinity and DO of the experimental sea water before and after replacement (mean  $\pm$  SD).

|                   | C                  |                    | LS                 |                    | LP                 |                    | LPLS               |                    |
|-------------------|--------------------|--------------------|--------------------|--------------------|--------------------|--------------------|--------------------|--------------------|
|                   | Before             | After              | Before             | After              | Before             | After              | Before             | After              |
| pH                | 8.00<br>$\pm 0.10$ | 8.02<br>$\pm 0.03$ | 7.97<br>$\pm 0.10$ | 8.03<br>$\pm 0.04$ | 7.54<br>$\pm 0.06$ | 7.55<br>$\pm 0.05$ | 7.53<br>$\pm 0.08$ | 7.55<br>$\pm 0.05$ |
| Salinity<br>(psu) | 34.0<br>$\pm 0.0$  | 34.0<br>$\pm 0.0$  | 27.0<br>$\pm 0.0$  | 27.0<br>$\pm 0.0$  | 34.0<br>$\pm 0.0$  | 34.0<br>$\pm 0.0$  | 27.0<br>$\pm 0.0$  | 27.0<br>$\pm 0.0$  |
| DO (mg/L)         | 11.1<br>$\pm 1.4$  | 11.3<br>$\pm 0.6$  | 9.8<br>$\pm 1.0$   | 10.7<br>$\pm 0.5$  | 8.2<br>$\pm 1.3$   | 11.0<br>$\pm 0.6$  | 8.1<br>$\pm 1.1$   | 10.6<br>$\pm 0.4$  |

The pH and salinity were tend to be stable even the experimental seawater was replaced.

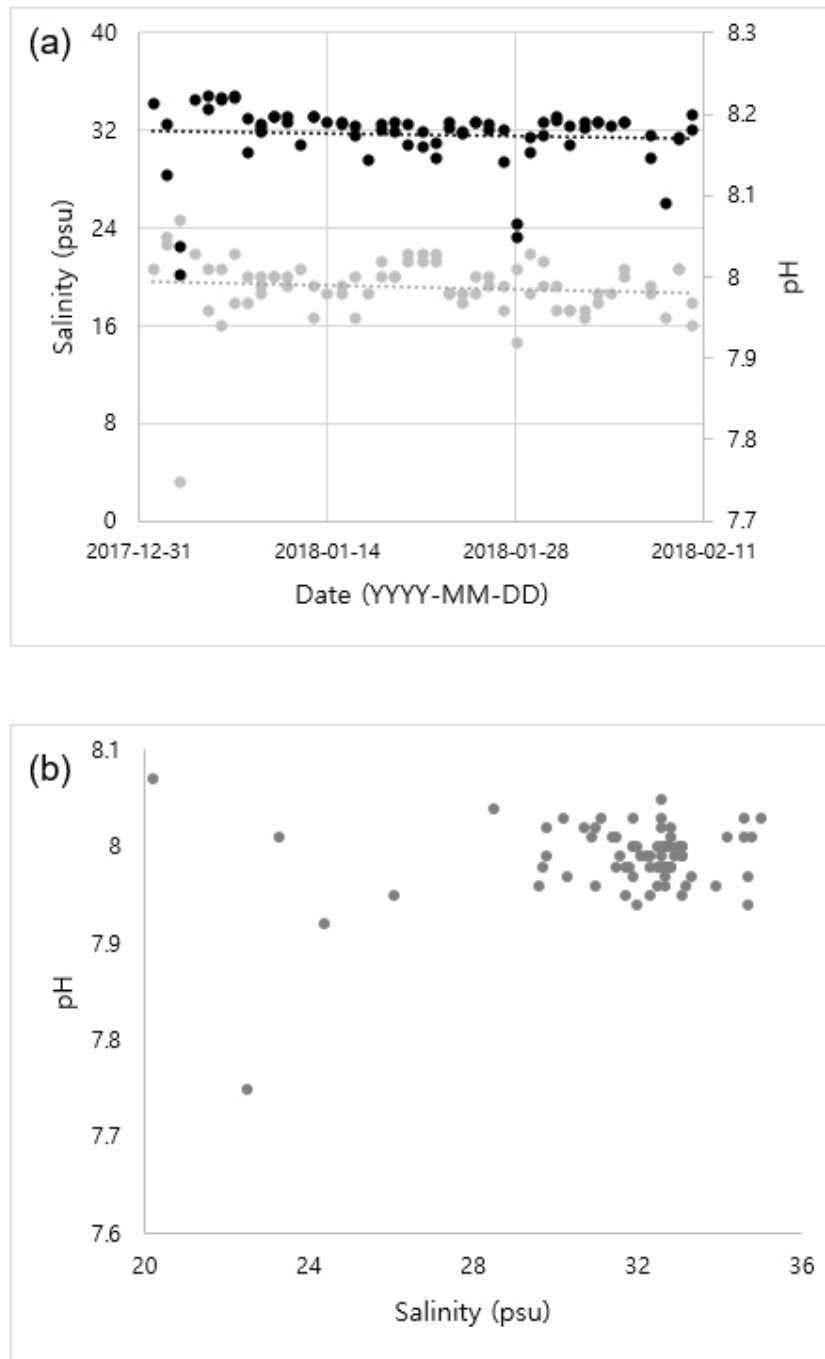

**Supplemental Figure S1.** Variation in the salinity and pH of sea water collected from the intertidal zone in front of King Sejong Station. Sea water was collected daily from Jan 1 to Feb 10, 2018. The salinity was  $31.7 \pm 2.6$  psu and the pH was  $7.99 \pm 0.04$  (mean  $\pm$  SD). **(a)** The pH and salinity had no relationships with the passage of time (linear regression test; pH:  $R = 0.102$ ,  $P = 0.388$ , salinity:  $R = 0.067$ ,  $P = 0.569$ ). The salinity and pH values were labeled with black and gray dots, respectively. **(b)** Correlation data of pH and salinity. The pH and salinity values had no correlation (Spearman correlation test,  $P = 0.880$ ,  $\rho = -0.018$ ).
